# Supplementary material
Source: PubMed Central journal article supplement (PMC7362742)

**Note to readers with disabilities:** *EHP* strives to ensure that all journal content is accessible to all readers. However, some figures and Supplemental Material published in *EHP* articles may not conform to [508 standards](#) due to the complexity of the information being presented. If you need assistance accessing journal content, please contact [ehp508@niehs.nih.gov](mailto:ehp508@niehs.nih.gov). Our staff will work with you to assess and meet your accessibility needs within 3 working days.

### **Supplemental Material**

#### **Flaring from Unconventional Oil and Gas Development and Birth Outcomes in the Eagle Ford Shale in South Texas**

Lara J. Cushing, Kate Vavra-Musser, Khang Chau, Meredith Franklin, and Jill E. Johnston

#### **Table of Contents**

**Table S1.** Adverse birth outcomes by mother's characteristics, study sample population from Texas Eagle Ford Shale region, 2012-2015 (N=23,487).

**Table S2.** Logistic regression model results estimating the association between the number of flares within 5km during pregnancy, preterm birth, and small-for-gestational age birth.

**Table S3.** Linear regression model results estimating the association between the number of flares within 5km during pregnancy and gestational age (in days) and term birth weight (in grams).

**Table S4.** Logistic regression model results estimating the association between flared area within 5km during pregnancy, preterm birth, and small-for-gestational age birth.

**Table S5.** Linear regression model results estimating the association between flared area within 5km during pregnancy and gestational age (in days) and term birth weight (in grams).

**Table S6.** Logistic regression model results estimating the association between the inverse squared distance-weighted number of flares within 5km during pregnancy, preterm birth, and small-for-gestational age birth.

**Table S7.** Linear regression model results estimating the association between the inverse squared distance weighted number of flares within 5km during pregnancy and gestational age (in days) and term birth weight (in grams).

**Table S8.** Stratified logistic regression model results estimating the association between the number of flares within 5km during pregnancy, preterm birth, and small-for-gestational age birth among Hispanic and non-Hispanic White women.

**Table S9.** Stratified linear regression model results estimating the association between the number of flares within 5km during pregnancy and gestational age (in days) and term birth weight (in grams) among Hispanic and non-Hispanic White women.

**Table S10.** Logistic regression model results estimating the association between the number of flares within 5km during pregnancy and preterm birth, controlling for rurality (residence in a census-designated place).

**Figure S1.** Construction of the dataset.

**Figure S2.** Spearman's correlation coefficients between the total number of flares within 5km during pregnancy, and the number of flares by trimester.

**Table S1.** Adverse birth outcomes by mother’s characteristics, study sample population from Texas Eagle Ford Shale region, 2012-2015 (N=23,487)

|                         | % PTB | P-value <sup>a</sup> | % SGA | P-value <sup>a</sup> |
|-------------------------|-------|----------------------|-------|----------------------|
| Maternal age            |       |                      |       |                      |
| < 20                    | 11.36 |                      | 13.40 |                      |
| 20-24                   | 10.69 |                      | 11.72 |                      |
| 25-29                   | 9.18  | <0.0005              | 9.38  | <0.0005              |
| 30-34                   | 10.86 |                      | 8.31  |                      |
| 35+                     | 12.88 |                      | 8.32  |                      |
| Education               |       |                      |       |                      |
| < high school or GED    | 12.26 |                      | 11.58 |                      |
| high school diploma/GED | 11.29 | <0.0005              | 11.60 | <0.0005              |
| ≥ some college          | 9.12  |                      | 8.52  |                      |
| Race/ethnicity          |       |                      |       |                      |
| Hispanic                | 9.32  |                      | 8.24  |                      |
| non-Hispanic White      | 11.04 | <0.0005              | 10.66 | <0.0005              |
| all others              | 13.13 |                      | 16.77 |                      |
| Foreign-born            |       |                      |       |                      |
| No                      | 10.70 |                      | 10.25 |                      |
| Yes                     | 9.79  | 0.091                | 10.18 | 0.895                |
| BMI                     |       |                      |       |                      |
| underweight/normal      | 10.50 |                      | 12.11 |                      |
| overweight              | 10.38 | 0.665                | 9.30  | <0.0005              |
| obese                   | 10.84 |                      | 8.26  |                      |
| Prenatal care           |       |                      |       |                      |
| None                    | 17.38 |                      | 12.45 |                      |
| Inadequate              | 9.84  | <0.0005              | 13.34 | <0.0005              |
| Intermediate            | 4.01  |                      | 10.48 |                      |
| Adequate                | 3.25  |                      | 9.92  |                      |
| Adequate Plus           | 17.99 |                      | 8.29  |                      |
| Smoking                 |       |                      |       |                      |
| No                      | 10.38 |                      | 9.87  |                      |
| Yes                     | 14.12 | <0.0005              | 16.75 | <0.0005              |
| Insurance               |       |                      |       |                      |
| Private insurance       | 9.13  | <0.0005              | 7.47  | <0.0005              |
| Medicaid/self-pay/other | 11.25 |                      | 11.60 |                      |
| High risk pregnancy     |       |                      |       |                      |
| Yes                     | 18.08 | <0.0005              | 11.79 | 0.011                |
| No                      | 9.77  |                      | 10.07 |                      |
| Infant sex              |       |                      |       |                      |
| male                    | 11.45 | <0.0005              | 10.10 | 0.493                |
| female                  | 9.88  |                      | 10.37 |                      |

|              |       |         |       |         |
|--------------|-------|---------|-------|---------|
| Parity       |       |         |       |         |
| nulliparous  | 10.19 |         | 12.42 |         |
| multiparous  | 10.75 | 0.183   | 9.05  | <0.0005 |
| Year         |       |         |       |         |
| 2012         | 19.77 |         | 9.03  |         |
| 2013         | 11.03 |         | 10.07 |         |
| 2014         | 10.18 | <0.0005 | 10.54 | <0.0005 |
| 2015         | 9.63  |         | 10.20 |         |
| Season       |       |         |       |         |
| Spring (MAM) | 10.78 |         | 10.33 |         |
| Summer (JJA) | 10.48 |         | 9.72  |         |
| Fall (SON)   | 10.14 | 0.568   | 10.90 | 0.172   |
| Winter (DJF) | 10.87 |         | 10.03 |         |

Note: See main text for the definition of variables. BMI = body mass index. CI = Confidence Interval. DJF = December, January, February. GED = general education development. JJA = June, July August. MAM = March, April, May. PTB = preterm birth( <37 completed weeks). SGA = small-for-gestational age. SON = September, October, November.

<sup>a</sup> Chi-square test

**Table S2.** Logistic regression model results estimating the association between the number of flares within 5km during pregnancy, preterm birth, and small-for-gestational age birth

|                                                  | Preterm birth<br>N=23,158 |                       | Small-for-gestational age<br>N=23,154 |                       |
|--------------------------------------------------|---------------------------|-----------------------|---------------------------------------|-----------------------|
|                                                  | Model 1<br>β (95% CI)     | Model 2<br>β (95% CI) | Model 1<br>β (95% CI)                 | Model 2<br>β (95% CI) |
| Flares within 5km (ref: 0)                       |                           |                       |                                       |                       |
| low (1 -9)                                       | 0.82 (0.64, 1.04)         | 0.76 (0.60, 0.97)     | 0.88 (0.69, 1.11)                     | 0.89 (0.71, 1.14)     |
| high (≥10)                                       | 1.50 (1.23, 1.83)         | 1.41 (1.11, 1.69)     | 0.97 (0.78, 1.22)                     | 1.02 (0.82, 1.29)     |
| Wells within 5km (ref: 0)                        |                           |                       |                                       |                       |
| low                                              | -                         | 1.19 (1.06, 1.35)     | -                                     | 0.95 (0.84, 1.07)     |
| medium                                           | -                         | 1.35 (1.19, 1.53)     | -                                     | 0.98 (0.87, 1.11)     |
| high                                             | -                         | 1.31 (1.14, 1.49)     | -                                     | 0.90 (0.79, 1.02)     |
| Age (ref: 20-24)                                 |                           |                       |                                       |                       |
| < 20                                             | 0.97 (0.83, 1.14)         | 0.97 (0.83, 1.14)     | 0.93 (0.80, 1.07)                     | 0.93 (0.80, 1.07)     |
| 25-29                                            | 0.91 (0.81, 1.03)         | 0.91 (0.81, 1.03)     | 0.96 (0.86, 1.08)                     | 0.97 (0.86, 1.08)     |
| 30-34                                            | 1.10 (0.96, 1.26)         | 1.10 (0.96, 1.26)     | 0.94 (0.82, 1.08)                     | 0.94 (0.82, 1.08)     |
| 35+                                              | 1.26 (1.07, 1.48)         | 1.27 (1.08, 1.49)     | 0.91 (0.76, 1.10)                     | 0.91 (0.76, 1.10)     |
| Race/ethnicity (ref: Hispanic)                   |                           |                       |                                       |                       |
| non-Hispanic White                               | 0.92 (0.83, 1.03)         | 0.91 (0.81, 1.02)     | 0.73 (0.65, 0.81)                     | 0.73 (0.65, 0.82)     |
| all others                                       | 1.28 (1.10, 1.50)         | 1.27 (1.19, 1.49)     | 1.60 (1.40, 1.84)                     | 1.60 (1.39, 1.84)     |
| Foreign-born (ref: no)                           | 0.80 (0.70, 0.91)         | 0.81 (0.71, 0.93)     | 0.90 (0.79, 1.02)                     | 0.89 (0.79, 1.02)     |
| Education (ref: ≥ some college)                  |                           |                       |                                       |                       |
| < high school or GED                             | 1.36 (1.19, 1.55)         | 1.35 (1.19, 1.54)     | 1.14 (1.00, 1.30)                     | 1.14 (1.00, 1.30)     |
| high school or GED                               | 1.22 (1.09, 1.36)         | 1.22 (1.09, 1.36)     | 1.17 (1.05, 1.31)                     | 1.18 (1.05, 1.31)     |
| BMI (ref: underweight or normal)                 |                           |                       |                                       |                       |
| overweight                                       | 0.91 (0.82, 1.01)         | 0.91 (0.82, 1.02)     | 0.74 (0.67, 0.83)                     | 0.74 (0.67, 0.83)     |
| obese                                            | 0.87 (0.78, 0.97)         | 0.87 (0.78, 0.97)     | 0.63 (0.56, 0.70)                     | 0.62 (0.56, 0.70)     |
| Smoking (ref: no)                                | 1.40 (1.17, 1.69)         | 1.41 (1.17, 1.70)     | 1.83 (1.54, 2.16)                     | 1.83 (1.54, 2.17)     |
| Private insurance (ref: Medicaid/self-pay/other) | 0.97 (0.86, 1.08)         | 0.96 (0.86, 1.07)     | 0.75 (0.67, 0.84)                     | 0.75 (0.67, 0.84)     |
| Parity (ref: multiparous)                        | 0.97 (0.87, 1.08)         | 0.97 (0.88, 1.08)     | 1.41 (1.27, 1.56)                     | 1.41 (1.27, 1.56)     |
| High-risk pregnancy (ref: no)                    | 1.81 (1.60, 2.06)         | 1.79 (1.58, 2.03)     | 1.37 (1.18, 1.58)                     | 1.37 (1.18, 1.58)     |

|                               |                   |                   |                   |                   |
|-------------------------------|-------------------|-------------------|-------------------|-------------------|
| Infant sex (ref: female)      | 1.21 (1.10, 1.31) | 1.20 (1.10, 1.31) | 0.97 (0.89, 1.05) | 0.97 (0.89, 1.05) |
| Prenatal care (ref: adequate) |                   |                   |                   |                   |
| no care                       | 5.61 (4.69, 6.71) | 5.53 (4.62, 6.62) | 1.18 (1.00, 1.39) | 1.19 (1.01, 1.40) |
| inadequate                    | 2.98 (2.52, 3.52) | 2.95 (2.50, 3.49) | 1.21 (1.07, 1.36) | 1.21 (1.07, 1.36) |
| intermediate                  | 1.21 (0.93, 1.58) | 1.20 (0.92, 1.56) | 1.04 (0.88, 1.23) | 1.04 (0.88, 1.23) |
| adequate+                     | 6.27 (5.44, 7.22) | 6.41 (5.56, 7.38) | 0.79 (0.70, 0.88) | 0.78 (0.70, 0.88) |
| Year (ref: 2015)              |                   |                   |                   |                   |
| 2012                          | 2.42 (1.94, 3.02) | 2.41 (1.93, 3.01) | 0.85 (0.64, 1.13) | 0.85 (0.64, 1.13) |
| 2013                          | 1.19 (1.07, 1.33) | 1.19 (1.06, 1.33) | 0.97 (0.87, 1.08) | 0.97 (0.87, 1.08) |
| 2014                          | 1.07 (0.95, 1.19) | 1.06 (0.95, 1.18) | 1.01 (0.91, 1.13) | 1.02 (0.91, 1.13) |
| Season (ref: summer [JJA])    |                   |                   |                   |                   |
| spring (MAM)                  | 1.03 (0.91, 1.16) | 1.02 (0.91, 1.16) | 1.08 (1.95, 1.22) | 1.08 (1.95, 1.22) |
| fall (SON)                    | 0.95 (0.84, 1.07) | 0.94 (0.84, 1.07) | 1.13 (1.00, 1.28) | 1.13 (1.01, 1.28) |
| winter (DJF)                  | 0.95 (0.84, 1.08) | 0.95 (0.84, 1.08) | 1.03 (0.91, 1.16) | 1.03 (0.91, 1.17) |

Note: See main text for the definition of variables. BMI = body mass index. CI = Confidence Interval. DJF = December, January, February. GED = general education development. JJA = June, July August. MAM = March, April, May. SON = September, October, November

**Table S3.** Linear regression model results estimating the association between the number of flares within 5km during pregnancy and gestational age (in days) and term birth weight (in grams)

|                                                  | Gestational age<br>N=23,158 |                       | Term birthweight<br>(≥ 37 completed weeks)<br>N=20,716 |                         |
|--------------------------------------------------|-----------------------------|-----------------------|--------------------------------------------------------|-------------------------|
|                                                  | Model 1<br>β (95% CI)       | Model 2<br>β (95% CI) | Model 1<br>β (95% CI)                                  | Model 2<br>β (95% CI)   |
| Flares within 5km (ref: 0)                       |                             |                       |                                                        |                         |
| low (1 -9)                                       | 0.1 (-0.9, 1.0)             | 0.5 (-0.5, 1.4)       | -10.5 (-40.4, 19.4)                                    | -5.9 (-36.0, 24.3)      |
| high (≥10)                                       | -1.9 (-2.8, -0.9)           | -1.5 (-2.4, -0.5)     | -19.0 (-49.5, 11.5)                                    | -9.2 (-40.9, 22.5)      |
| Wells within 5km (ref: 0)                        |                             |                       |                                                        |                         |
| low                                              | -                           | -1.0 (-1.5, -0.5)     | -                                                      | 0.4 (-15.7, 16.6)       |
| medium                                           | -                           | -1.8 (-2.3, -1.2)     | -                                                      | -18.6 (-35.5, -1.7)     |
| high                                             | -                           | -1.3 (-1.9, -0.8)     | -                                                      | -19.4 (-36.7, -2.0)     |
| Age (ref: 20-24)                                 |                             |                       |                                                        |                         |
| < 20                                             | -0.5 (-1.2, 0.2)            | -0.5 (-1.2, 0.2)      | -0.5 (-21.4, 22.4)                                     | 0.4 (-21.5, 22.3)       |
| 25-29                                            | 0.1 (-0.4, 0.6)             | 0.1 (-0.4, 0.6)       | 24.6 (8.8, 40.4)                                       | 24.8 (8.9, 40.6)        |
| 30-34                                            | -0.5 (-1.1, 0.1)            | -0.5 (-1.1, 0.1)      | 47.9 (29.3, 66.4)                                      | 47.9 (29.4, 66.5)       |
| 35+                                              | -1.8 (-2.5, -1.1)           | -1.9 (-2.6, -1.1)     | 50.5 (27.2, 73.9)                                      | 50.3 (26.9, 73.6)       |
| Race/ethnicity (ref: Hispanic)                   |                             |                       |                                                        |                         |
| non-Hispanic White                               | 0.3 (-0.1, 0.8)             | 0.4 (-0.1, 0.8)       | 84.2 (69.6, 98.7)                                      | 85.3 (70.7, 99.8)       |
| all others                                       | -2.1 (-2.8, -1.4)           | -2.1 (-2.8, -1.4)     | -104.0 (-126.9, -81.1)                                 | -104.8 (-127.7, -81.9)  |
| Foreign-born (ref: no)                           | 1.4 (0.8, 1.9)              | 1.2 (0.7, 1.7)        | 50.6 (32.9, 68.3)                                      | 48.9 (31.2, 66.6)       |
| Education (ref: ≥ some college)                  |                             |                       |                                                        |                         |
| < high school or GED                             | -1.1 (-1.7, -0.6)           | -1.1 (-1.7, -0.6)     | -37.6 (-55.8, -19.5)                                   | -37.1 (-55.3, -19.0)    |
| high school or GED                               | -0.6 (-1.0, -0.1)           | -0.6 (-1.0, -0.1)     | -31.7 (-46.4, -17.0)                                   | -31.2 (-45.9, -16.5)    |
| BMI (ref: underweight or normal)                 |                             |                       |                                                        |                         |
| overweight                                       | 0.5 (0.0, 1.0)              | 0.5 (0.0, 0.9)        | 73.7 (59.2, 88.2)                                      | 73.7 (59.2, 88.2)       |
| obese                                            | 0.6 (0.2, 1.1)              | 0.6 (0.1, 1.0)        | 136.9 (122.6, 151.3)                                   | 137.0 (122.7, 151.3)    |
| Smoking (ref: no)                                | -1.6 (-2.5, -0.7)           | -1.6 (-2.5, -0.8)     | -142.4 (-170.4, -114.4)                                | -142.9 (-170.9, -114.9) |
| Private insurance (ref: Medicaid/self-pay/other) | -0.2 (-0.7, 0.2)            | -0.2 (-0.6, 0.3)      | 47.0 (32.2, 61.7)                                      | 47.3 (32.5, 62.0)       |
| Parity (ref: multiparous)                        | 1.7 (1.3, 2.1)              | 1.7 (1.2, 2.1)        | -62.8 (-76.7, -48.8)                                   | -63.1 (-77.0, -49.1)    |

|                                   |                   |                   |                      |                      |
|-----------------------------------|-------------------|-------------------|----------------------|----------------------|
| High-risk pregnancy (ref: no)     | -4.9 (-5.5, -4.3) | -4.8 (-5.5, -4.2) | -12.4 (-33.5, 8.7)   | -12.1 (-33.3, 9.0)   |
| Infant sex (ref: female)          | -1.0 (-1.4, -0.7) | -1.0 (-1.4, -0.7) | 133.8 (122.2, 145.5) | 133.9 (122.3, 145.6) |
| Prenatal care (ref: adequate)     |                   |                   |                      |                      |
| no care                           | -7.0 (-7.8, -6.3) | -7.0 (-7.7, -6.2) | -45.5 (-69.5, -21.4) | -44.7 (-68.7, -20.6) |
| inadequate                        | -1.7 (-2.3, -1.2) | -1.7 (-2.2, -1.1) | -44.1 (-61.4, -26.8) | -43.6 (-60.9, -26.2) |
| intermediate                      | 2.3 (1.6, 3.0)    | 2.4 (1.7, 3.1)    | -18.3 (-40.1, 3.5)   | -16.9 (-38.7, 4.9)   |
| adequate+                         | -8.5 (-9.0, -8.1) | -8.6 (-9.1, -8.2) | 5.8 (-9.1, 20.7)     | 4.0 (-10.9, 19.0)    |
| Year (ref: 2015)                  |                   |                   |                      |                      |
| 2012                              | -7.4 (-8.6, -6.3) | -7.4 (-8.5, -6.3) | 9.2 (-29.3, 47.7)    | 8.7 (-29.8, 47.1)    |
| 2013                              | -0.9 (-1.4, -0.4) | -0.9 (-1.3, -0.4) | -5.4 (-9.4, 20.2)    | 5.3 (-9.6, 20.1)     |
| 2014                              | -0.5 (-1.0, -0.1) | -0.5 (-0.9, 0.0)  | -2.8 (-11.7, 17.2)   | 3.0 (-11.4, 17.5)    |
| Season (ref: summer [JJA])        |                   |                   |                      |                      |
| spring (MAM)                      | 0.2 (-0.3, 0.7)   | 0.2 (-0.3, 0.7)   | 3.0 (-13.6, 19.6)    | 3.1 (-13.5, 19.7)    |
| fall (SON)                        | 0.5 (0.0, 1.0)    | 0.5 (0.0, 1.0)    | -6.5 (-22.7, 9.6)    | -6.5 (-22.7, 9.7)    |
| winter (DJF)                      | 1.3 (0.8, 1.8)    | 1.3 (0.8, 1.8)    | -2.5 (-19.2, 14.2)   | -2.7 (-19.4, 14.0)   |
| Gestational age (completed weeks) | --                | --                | 67.5 (62.8, 72.3)    | 67.2 (62.4, 71.9)    |

Note: See main text for the definition of variables. BMI = body mass index. CI = Confidence Interval. DJF = December, January, February. GED = general education development. JJA = June, July August. MAM = March, April, May. SON = September, October, November.



**Table S4.** Logistic regression model results estimating the association between flared area within 5km during pregnancy, preterm birth, and small-for-gestational age birth

|                                                  | Preterm birth<br>N=23,158 |                       | Small-for-gestational age<br>N=23,154 |                       |
|--------------------------------------------------|---------------------------|-----------------------|---------------------------------------|-----------------------|
|                                                  | Model 1<br>β (95% CI)     | Model 2<br>β (95% CI) | Model 1<br>β (95% CI)                 | Model 2<br>β (95% CI) |
| Flared area within 5km (ref: 0)                  |                           |                       |                                       |                       |
| low (0.1 – 24.0 m <sup>2</sup> )                 | 0.85 (0.67, 1.08)         | 0.79 (0.62, 1.00)     | 0.90 (0.71, 1.14)                     | 0.92 (0.73, 1.16)     |
| high (24.2 – 1,563.6 m <sup>2</sup> )            | 1.47 (1.20, 1.79)         | 1.34 (1.08, 1.65)     | 0.95 (0.76, 1.19)                     | 1.00 (0.79, 1.26)     |
| Wells within 5km (ref: 0)                        |                           |                       |                                       |                       |
| low                                              | --                        | 1.19 (1.06, 1.35)     | --                                    | 0.95 (0.85, 1.07)     |
| medium                                           | --                        | 1.35 (1.19, 1.53)     | --                                    | 0.98 (0.87, 1.11)     |
| high                                             | --                        | 1.31 (1.14, 1.49)     | --                                    | 0.90 (0.79, 1.02)     |
| Age (ref: 20-24)                                 |                           |                       |                                       |                       |
| < 20                                             | 0.97 (0.83, 1.14)         | 0.97 (0.8, 1.14)      | 0.93 (0.80, 1.07)                     | 0.93 (0.80, 1.07)     |
| 25-29                                            | 0.91 (0.81, 1.03)         | 0.92 (0.81, 1.03)     | 0.96 (0.86, 1.08)                     | 0.96 (0.86, 1.08)     |
| 30-34                                            | 1.10 (0.96, 1.26)         | 1.10 (0.96, 1.26)     | 0.94 (0.82, 1.08)                     | 0.94 (0.82, 1.08)     |
| 35+                                              | 1.26 (1.07, 1.48)         | 1.27 (1.08, 1.49)     | 0.91 (0.76, 1.10)                     | 0.91 (0.76, 1.10)     |
| Race/ethnicity (ref: Hispanic)                   |                           |                       |                                       |                       |
| non-Hispanic White                               | 0.92 (0.82, 1.03)         | 0.91 (0.81, 1.01)     | 0.73 (0.65, 0.81)                     | 0.73 (0.65, 0.81)     |
| all others                                       | 1.28 (1.09, 1.50)         | 1.27 (1.08, 1.49)     | 1.60 (1.40, 1.84)                     | 1.60 (1.39, 1.84)     |
| Foreign-born (ref: no)                           | 0.79 (0.70, 0.91)         | 0.81 (0.71, 0.92)     | 0.90 (0.79, 1.02)                     | 0.89 (0.79, 1.02)     |
| Education (ref: ≥ some college)                  |                           |                       |                                       |                       |
| < high school or GED                             | 1.36 (1.19, 1.55)         | 1.35 (1.19, 1.54)     | 1.14 (1.00, 1.30)                     | 1.14 (1.00, 1.30)     |
| high school or GED                               | 1.22 (1.09, 1.36)         | 1.22 (1.09, 1.36)     | 1.17 (1.05, 1.31)                     | 1.18 (1.05, 1.31)     |
| BMI (ref: underweight or normal)                 |                           |                       |                                       |                       |
| overweight                                       | 0.91 (0.82, 1.01)         | 0.91 (0.82, 1.02)     | 0.74 (0.67, 0.83)                     | 0.74 (0.67, 0.83)     |
| obese                                            | 0.87 (0.78, 0.97)         | 0.87 (0.78, 0.97)     | 0.63 (0.56, 0.70)                     | 0.62 (0.56, 0.70)     |
| Smoking (ref: no)                                | 1.40 (1.17, 1.69)         | 1.41 (1.17, 1.70)     | 1.83 (1.54, 2.17)                     | 1.83 (1.54, 2.17)     |
| Private insurance (ref: Medicaid/self-pay/other) | 0.97 (0.86, 1.08)         | 0.96 (0.87, 1.07)     | 0.75 (0.67, 0.84)                     | 0.75 (0.67, 0.84)     |
| Parity (ref: multiparous)                        | 0.97 (0.87, 1.07)         | 0.97 (0.88, 1.08)     | 1.41 (1.28, 1.56)                     | 1.41 (1.27, 1.56)     |
| High-risk pregnancy (ref: no)                    | 1.81 (1.60, 2.06)         | 1.79 (1.58, 2.03)     | 1.37 (1.18, 1.58)                     | 1.47 (1.19, 1.60)     |

|                               |                   |                   |                   |                   |
|-------------------------------|-------------------|-------------------|-------------------|-------------------|
| Infant sex (ref: female)      | 1.21 (1.11, 1.31) | 1.20 (1.10, 1.31) | 0.97 (0.89, 1.05) | 0.97 (0.89, 1.05) |
| Prenatal care (ref: adequate) |                   |                   |                   |                   |
| no care                       | 5.60 (4.68, 6.70) | 5.53 (4.62, 6.61) | 1.18 (1.00, 1.39) | 1.19 (1.01, 1.40) |
| inadequate                    | 3.00 (2.52, 3.52) | 2.95 (2.50, 3.50) | 1.21 (1.07, 1.36) | 1.21 (1.07, 1.36) |
| intermediate                  | 1.21 (0.93, 1.58) | 1.20 (0.92, 1.56) | 1.04 (0.88, 1.23) | 1.04 (0.88, 1.22) |
| adequate+                     | 6.26 (5.43, 7.21) | 6.40 (5.55, 7.37) | 0.79 (0.70, 0.88) | 0.78 (0.70, 0.88) |
| Year (ref: 2015)              |                   |                   |                   |                   |
| 2012                          | 2.42 (1.94, 3.02) | 2.41 (1.93, 3.01) | 0.85 (0.64, 1.13) | 0.85 (0.64, 1.13) |
| 2013                          | 1.19 (1.07, 1.33) | 1.19 (1.06, 1.33) | 0.97 (0.87, 1.08) | 0.97 (0.87, 1.08) |
| 2014                          | 1.06 (0.95, 1.19) | 1.05 (0.94, 1.18) | 1.01 (0.91, 1.13) | 1.01 (0.91, 1.13) |
| Season (ref: summer [JJA])    |                   |                   |                   |                   |
| spring (MAM)                  | 1.02 (0.91, 1.16) | 1.02 (0.90, 1.15) | 1.08 (0.95, 1.22) | 1.08 (0.95, 1.22) |
| fall (SON)                    | 0.95 (0.84, 1.07) | 0.94 (0.84, 1.07) | 1.13 (1.00, 1.28) | 1.13 (1.00, 1.28) |
| winter (DJF)                  | 0.95 (0.84, 1.08) | 0.95 (0.84, 1.08) | 1.03 (0.91, 1.16) | 1.03 (0.91, 1.17) |

Note: See main text for the definition of variables. BMI = body mass index. CI = Confidence Interval. DJF = December, January, February. GED = general education development. JJA = June, July August. MAM = March, April, May. SON = September, October, November.

**Table S5.** Linear regression model results estimating the association between flared area within 5km during pregnancy and gestational age (in days) and term birth weight (in grams)

|                                                  | Gestational age<br>N=23,158 |                       | Term birthweight<br>(≥ 37 completed weeks)<br>N=20,716 |                         |
|--------------------------------------------------|-----------------------------|-----------------------|--------------------------------------------------------|-------------------------|
|                                                  | Model 1<br>β (95% CI)       | Model 2<br>β (95% CI) | Model 1<br>β (95% CI)                                  | Model 2<br>β (95% CI)   |
| Flared area within 5km (ref: 0)                  |                             |                       |                                                        |                         |
| low (0.1 – 24.0 m <sup>2</sup> )                 | 0.2 (-0.7, 1.2)             | 0.6 (0.3, 1.6)        | -12.0 (-41.9, 17.9)                                    | -7.5 (-37.6, 22.7)      |
| high (24.2 – 1,563.6 m <sup>2</sup> )            | -2.0 (-3.0, -1.1)           | -1.7 (-2.6, -0.7)     | -17.4 (-47.9, 13.1)                                    | -7.5 (-39.2, 24.3)      |
| Wells within 5km (ref: 0)                        |                             |                       |                                                        |                         |
| low                                              | --                          | -1.0 (-1.5, -0.5)     | --                                                     | 0.5 (-15.7, 16.6)       |
| medium                                           | --                          | -1.8 (-2.3, -1.2)     | --                                                     | -18.5 (-35.4, -1.7)     |
| high                                             | --                          | -1.3 (-1.9, -0.8)     | --                                                     | -19.5 (-36.8, -2.2)     |
| Age (ref: 20-24)                                 |                             |                       |                                                        |                         |
| < 20                                             | -0.5 (-1.2, 0.2)            | -0.5 (-1.2, 0.2)      | 0.5 (-21.4, 22.4)                                      | 0.4 (-21.5, 22.3)       |
| 25-29                                            | 0.1 (-0.4, 0.6)             | 0.1 (-0.4, 0.6)       | 24.6 (8.8, 40.4)                                       | 24.8 (9.0, 40.6)        |
| 30-34                                            | -0.5 (-1.1, 0.1)            | -0.5 (-1.1, 0.1)      | 47.9 (29.3, 66.4)                                      | 47.9 (29.4, 66.5)       |
| 35+                                              | -1.8 (-2.5, -1.1)           | -1.9 (-2.6, -1.1)     | 50.5 (27.2, 73.9)                                      | 50.3 (27.0, 73.6)       |
| Race/ethnicity (ref: Hispanic)                   |                             |                       |                                                        |                         |
| non-Hispanic White                               | 0.3 (-0.1, 0.8)             | 0.4 (-0.1, 0.8)       | 84.2 (69.7, 98.8)                                      | 85.3 (70.7, 99.9)       |
| all others                                       | -2.1 (-2.8, -1.4)           | -2.1 (-2.8, -1.4)     | -104.0 (-126.9, -81.1)                                 | -104.8 (-127.7, -81.9)  |
| Foreign-born (ref: no)                           | 1.3 (0.8, 1.9)              | 1.2 (0.7, 1.8)        | 50.6 (33.0, 68.3)                                      | 48.9 (31.2, 66.6)       |
| Education (ref: ≥ some college)                  |                             |                       |                                                        |                         |
| < high school or GED                             | -1.1 (-1.7, -0.6)           | -1.1 (-1.7, -0.6)     | -37.6 (-55.8, -19.5)                                   | -37.1 (-55.3, -19.0)    |
| high school or GED                               | -0.6 (-1.0, -0.1)           | -0.6 (-1.0, -0.1)     | -31.7 (-46.4, 17.0)                                    | -31.2 (-45.9, -16.5)    |
| BMI (ref: underweight or normal)                 |                             |                       |                                                        |                         |
| overweight                                       | 0.5 (0.0, 0.9)              | 0.5 (0.0, 0.9)        | 73.7 (59.2, 88.2)                                      | 73.7 (59.2, 88.2)       |
| obese                                            | 0.6 (0.2, 1.1)              | 0.6 (0.1, 1.0)        | 136.9 (122.6, 151.3)                                   | 137.0 (122.7, 151.3)    |
| Smoking (ref: no)                                | -1.6 (-2.5, -0.7)           | -1.6 (-2.5, -0.8)     | -142.4 (-170.4, -114.4)                                | -142.9 (-170.9, -114.9) |
| Private insurance (ref: Medicaid/self-pay/other) | -0.2 (-0.7, 0.2)            | -0.2 (-0.6, 0.3)      | 46.9 (32.2, 61.7)                                      | 47.2 (32.5, 62.0)       |
| Parity (ref: multiparous)                        | 1.7 (1.3, 2.1)              | 1.7 (1.2, 2.1)        | -62.8 (-76.7, -48.8)                                   | -63.1 (-77.0, -49.1)    |

|                                   |                   |                   |                      |                      |
|-----------------------------------|-------------------|-------------------|----------------------|----------------------|
| High-risk pregnancy (ref: no)     | -4.9 (-5.5, -4.3) | -4.8 (-5.5, -4.2) | -12.4 (-33.5, 8.7)   | -12.1 (-33.3, 9.0)   |
| Infant sex (ref: female)          | -1.0 (-1.4, -0.7) | -1.0 (-1.4, -0.7) | 133.8 (122.2, 145.5) | 133.9 (122.3, 145.6) |
| Prenatal care (ref: adequate)     |                   |                   |                      |                      |
| no care                           | -7.0 (-7.7, -6.3) | -6.9 (-7.7, -6.2) | -45.5 (-69.5, -21.5) | -44.7 (-68.7, -20.7) |
| inadequate                        | -1.7 (-2.3, -1.2) | -1.7 (-2.2, -1.1) | -44.1 (-61.4, -26.8) | -43.6 (-60.9, -26.2) |
| intermediate                      | 2.3 (1.6, 3.0)    | 2.4 (1.7, 3.1)    | -18.3 (-40.1, 3.5)   | -16.9 (-38.7, 4.9)   |
| adequate+                         | -8.5 (-9.0, -8.1) | -8.6 (-9.1, -8.2) | 5.8 (-9.1, 20.8)     | 4.1 (-10.9, 19.0)    |
| Year (ref: 2015)                  |                   |                   |                      |                      |
| 2012                              | -7.4 (-8.6, -6.3) | -7.4 (-8.5, -6.3) | 9.2 (-29.3, 47.7)    | 8.7 (-29.8, 47.1)    |
| 2013                              | -0.9 (-1.4, -0.5) | -0.9 (-1.3, -0.4) | 5.5 (-9.4, 20.3)     | 5.3 (-9.5, 20.2)     |
| 2014                              | -0.5 (-1.0, -0.1) | -0.5 (-0.9, 0.0)  | 2.8 (-11.6, 17.3)    | 3.1 (-11.4, 17.5)    |
| Season (ref: summer [JJA])        |                   |                   |                      |                      |
| spring (MAM)                      | 0.2 (-0.3, 0.7)   | 0.2 (-0.3, 0.7)   | 3.0 (-13.6, 19.6)    | 3.1 (-13.5, 19.7)    |
| fall (SON)                        | 0.5 (0.0, 1.0)    | 0.5 (0.0, 1.0)    | -6.5 (-22.7, 9.6)    | -6.5 (-22.7, 9.6)    |
| winter (DJF)                      | 1.3 (0.8, 1.8)    | 1.3 (0.8, 1.8)    | -2.5 (-19.2, 14.2)   | -2.7 (-19.4, 14.0)   |
| Gestational age (completed weeks) | --                | --                | 67.5 (62.8, 72.3)    | 67.2 (62.4, 71.9)    |

Note: See main text for the definition of variables. BMI = body mass index. CI = Confidence Interval. DJF = December, January, February. GED = general education development. JJA = June, July August. MAM = March, April, May. SON = September, October, November.

**Table S6.** Logistic regression model results estimating the association between the inverse squared distance-weighted number of flares within 5km during pregnancy, preterm birth, and small-for-gestational age birth

|                                                                                  | Preterm birth<br>N=23,158 |                       | Small-for-gestational age<br>N=23,154 |                       |
|----------------------------------------------------------------------------------|---------------------------|-----------------------|---------------------------------------|-----------------------|
|                                                                                  | Model 1<br>β (95% CI)     | Model 2<br>β (95% CI) | Model 1<br>β (95% CI)                 | Model 2<br>β (95% CI) |
| Distance weighted sum of flares within 5km (ref: 0)                              |                           |                       |                                       |                       |
| low<br>(4.0 x 10 <sup>-8</sup> – 1.0 x 10 <sup>-6</sup> flares/m <sup>2</sup> )  | 0.88 (0.70, 1.12)         | 0.82 (0.65, 1.04)     | 0.96 (0.76, 1.20)                     | 0.98 (0.78, 1.23)     |
| high<br>(1.0 x 10 <sup>-6</sup> – 1.0 x 10 <sup>-3</sup> flares/m <sup>2</sup> ) | 1.42 (1.16, 1.74)         | 1.30 (1.05, 1.60)     | 0.90 (0.71, 1.13)                     | 0.94 (0.74, 1.20)     |
| Wells within 5km (ref: 0)                                                        |                           |                       |                                       |                       |
| low                                                                              | --                        | 1.19 (1.05, 1.35)     | --                                    | 0.95 (0.84, 1.07)     |
| medium                                                                           | --                        | 1.35 (1.19, 1.53)     | --                                    | 0.98 (0.87, 1.11)     |
| high                                                                             | --                        | 1.31 (1.15, 1.49)     | --                                    | 0.90 (0.79, 1.03)     |
| Age (ref: 20-24)                                                                 |                           |                       |                                       |                       |
| < 20                                                                             | 0.97 (0.83, 1.14)         | 0.97 (0.83, 1.14)     | 0.93 (0.80, 1.07)                     | 0.93 (0.80, 1.07)     |
| 25-29                                                                            | 0.91 (0.81, 1.03)         | 0.91 (0.81, 1.03)     | 0.96 (0.86, 1.08)                     | 0.96 (0.86, 1.08)     |
| 30-34                                                                            | 1.10 (0.96, 1.26)         | 1.10 (0.96, 1.26)     | 0.94 (0.82, 1.08)                     | 0.94 (0.82, 1.08)     |
| 35+                                                                              | 1.26 (1.07, 1.48)         | 1.27 (1.07, 1.49)     | 0.91 (0.76, 1.10)                     | 0.91 (0.76, 1.10)     |
| Race/ethnicity (ref: Hispanic)                                                   |                           |                       |                                       |                       |
| non-Hispanic White                                                               | 0.92 (0.82, 1.03)         | 0.91 (0.81, 1.01)     | 0.73 (0.65, 0.81)                     | 0.73 (0.65, 0.81)     |
| all others                                                                       | 1.28 (1.09, 1.49)         | 1.27 (1.09, 1.49)     | 1.60 (1.39, 1.84)                     | 1.60 (1.39, 1.84)     |
| Foreign-born (ref: no)                                                           | 0.80 (0.70, 0.91)         | 0.81 (0.71, 0.93)     | 0.90 (0.79, 1.02)                     | 0.90 (0.79, 1.02)     |
| Education (ref: ≥ some college)                                                  |                           |                       |                                       |                       |
| < high school or GED                                                             | 1.36 (1.19, 1.55)         | 1.35 (1.19, 1.54)     | 1.14 (1.00, 1.30)                     | 1.14 (1.00, 1.30)     |
| high school or GED                                                               | 1.22 (1.09, 1.36)         | 1.22 (1.09, 1.36)     | 1.17 (1.05, 1.31)                     | 1.17 (1.05, 1.31)     |
| BMI (ref: underweight or normal)                                                 |                           |                       |                                       |                       |
| overweight                                                                       | 0.91 (0.82, 1.01)         | 0.91 (0.82, 1.02)     | 0.74 (0.67, 0.83)                     | 0.74 (0.67, 0.83)     |
| obese                                                                            | 0.87 (0.78, 0.97)         | 0.87 (0.78, 0.97)     | 0.63 (0.56, 0.70)                     | 0.63 (0.56, 0.70)     |
| Smoking (ref: no)                                                                | 1.41 (1.17, 1.69)         | 1.41 (1.18, 1.70)     | 1.83 (1.54, 2.17)                     | 1.83 (1.54, 2.17)     |
| Private insurance (ref: Medicaid/self-pay/other)                                 | 0.97 (0.86, 1.08)         | 0.96 (0.86, 1.07)     | 0.75 (0.67, 0.84)                     | 0.75 (0.67, 0.84)     |

|                               |                   |                   |                   |                   |
|-------------------------------|-------------------|-------------------|-------------------|-------------------|
| Parity (ref: multiparous)     | 0.97 (0.87, 1.07) | 0.97 (0.88, 1.08) | 1.41 (1.27, 1.56) | 1.41 (1.27, 1.56) |
| High-risk pregnancy (ref: no) | 1.81 (1.60, 2.06) | 1.97 (1.58, 2.03) | 1.36 (1.18, 1.58) | 1.37 (1.19, 1.58) |
| Infant sex (ref: female)      | 1.20 (1.10, 1.31) | 1.20 (1.10, 1.31) | 0.97 (0.89, 1.05) | 0.97 (0.89, 1.05) |
| Prenatal care (ref: adequate) |                   |                   |                   |                   |
| no care                       | 5.61 (4.69, 6.71) | 5.53 (4.62, 6.72) | 1.18 (1.01, 1.39) | 1.19 (1.01, 1.40) |
| inadequate                    | 2.98 (2.52, 3.52) | 2.95 (2.50, 3.49) | 1.21 (1.07, 1.36) | 1.21 (1.07, 1.36) |
| intermediate                  | 1.21 (0.94, 1.58) | 1.20 (0.92, 1.56) | 1.04 (0.88, 1.23) | 1.04 (0.88, 1.23) |
| adequate+                     | 6.25 (5.43, 7.21) | 6.39 (5.55, 7.73) | 0.79 (0.70, 0.88) | 0.78 (0.70, 0.88) |
| Year (ref: 2015)              |                   |                   |                   |                   |
| 2012                          | 2.42 (1.94, 3.02) | 2.41 (1.93, 3.01) | 0.85 (0.64, 1.13) | 0.85 (0.64, 1.13) |
| 2013                          | 1.19 (1.06, 1.33) | 1.19 (1.06, 1.33) | 0.96 (0.86, 1.08) | 0.96 (0.86, 1.08) |
| 2014                          | 1.06 (0.95, 1.19) | 1.05 (0.94, 1.18) | 1.01 (0.91, 1.12) | 1.01 (0.91, 1.13) |
| Season (ref: summer [JJA])    |                   |                   |                   |                   |
| spring (MAM)                  | 1.03 (0.91, 1.16) | 1.02 (0.91, 1.16) | 1.08 (0.95, 1.22) | 1.08 (0.95, 1.22) |
| fall (SON)                    | 0.95 (0.84, 1.07) | 0.94 (0.84, 1.06) | 1.13 (1.01, 1.28) | 1.13 (1.01, 1.28) |
| winter (DJF)                  | 0.95 (0.84, 1.08) | 0.95 (0.84, 1.07) | 1.03 (0.91, 1.16) | 1.03 (0.91, 1.17) |

Note: BMI = body mass index. DJF = December, January, February. GED = general education development. JJA = June, July August. MAM = March, April, May. SD = standard deviation. SON = September, October, November.

**Table S7.** Linear regression model results estimating the association between the inverse squared distance weighted number of flares within 5km during pregnancy and gestational age (in days) and term birth weight (in grams)

|                                                                            | Gestational age<br>N=23,158 |                       | Term birthweight<br>(≥ 37 completed weeks)<br>N=20,716 |                         |
|----------------------------------------------------------------------------|-----------------------------|-----------------------|--------------------------------------------------------|-------------------------|
|                                                                            | Model 1<br>β (95% CI)       | Model 2<br>β (95% CI) | Model 1<br>β (95% CI)                                  | Model 2<br>β (95% CI)   |
| Distance weighted sum of flares within 5km (ref: 0)                        |                             |                       |                                                        |                         |
| low ( $4.0 \times 10^{-8}$ – $1.0 \times 10^{-6}$ flares/m <sup>2</sup> )  | 0.1 (-0.8, 1.1)             | 0.5 (-0.4, 1.5)       | -25.0 (-54.9, 4.8)                                     | -20.2 (-50.3, 9.9)      |
| high ( $1.0 \times 10^{-6}$ – $1.0 \times 10^{-3}$ flares/m <sup>2</sup> ) | -1.9 (-2.9, -1.0)           | -1.5 (-2.5, -0.6)     | -3.8 (-34.4, 26.7)                                     | 6.8 (-24.9, 38.5)       |
| Wells within 5km (ref: 0)                                                  |                             |                       |                                                        |                         |
| low                                                                        | --                          | -1.0 (-1.5, -0.5)     | --                                                     | 1.0 (-15.2, 17.1)       |
| medium                                                                     | --                          | -1.8 (-2.3, -1.2)     | --                                                     | -18.2 (-35.1, -1.3)     |
| high                                                                       | --                          | -1.3 (-1.9, -0.8)     | --                                                     | -20.5 (-37.9, -3.2)     |
| Age (ref: 20-24)                                                           |                             |                       |                                                        |                         |
| < 20                                                                       | -0.5 (-1.2, 0.2)            | -0.5 (-1.2, 0.2)      | 0.5 (-21.3, 22.4)                                      | 0.5 (-21.4, 22.3)       |
| 25-29                                                                      | 0.1 (-0.4, 0.6)             | 0.1 (-0.4, 0.6)       | 24.7 (8.9, 40.5)                                       | 24.9 (9.1, 40.7)        |
| 30-34                                                                      | -0.5 (-1.1, 0.1)            | -0.5 (-1.1, 0.1)      | 48.0 (29.5, 66.6)                                      | 48.1 (29.6, 66.7)       |
| 35+                                                                        | -1.8 (-2.5, -1.1)           | -1.9 (-2.6, -1.1)     | 50.7 (33.1, 68.4)                                      | 50.4 (27.1, 73.8)       |
| Race/ethnicity (ref: Hispanic)                                             |                             |                       |                                                        |                         |
| non-Hispanic White                                                         | 0.3 (-0.1, 0.8)             | 0.4 (-0.1, 0.9)       | 84.3 (69.8, 98.9)                                      | 85.4 (70.9, 100.0)      |
| all others                                                                 | -2.1 (-2.8, -1.4)           | -2.1 (-2.8, -1.4)     | -103.9 (-126.7, -81.0)                                 | -104.7 (-127.6, -81.8)  |
| Foreign-born (ref: no)                                                     | 1.3 (0.8, 1.9)              | 1.2 (0.7, 1.8)        | 50.7 (33.1, 68.4)                                      | 49.0 (31.3, 66.7)       |
| Education (ref: ≥ some college)                                            |                             |                       |                                                        |                         |
| < high school or GED                                                       | -1.1 (-1.7, -0.6)           | -1.1 (-1.7, -0.6)     | -37.7 (-55.8, -19.5)                                   | -37.1 (-55.3, -18.9)    |
| high school or GED                                                         | -0.6 (-1.0, -0.1)           | -0.5 (-1.0, -0.1)     | -31.8 (-46.5, -17.1)                                   | -31.3 (-46.0, -16.6)    |
| BMI (ref: underweight or normal)                                           |                             |                       |                                                        |                         |
| overweight                                                                 | 0.5 (0.0, 0.9)              | 0.5 (0.0, 0.9)        | 73.6 (59.1, 88.1)                                      | 73.7 (59.2, 88.2)       |
| obese                                                                      | 0.6 (0.2, 1.1)              | 0.6 (0.1, 1.0)        | 136.9 (122.6, 151.2)                                   | 137.0 (122.7, 151.3)    |
| Smoking (ref: no)                                                          | -1.6 (-2.5, -0.8)           | -1.6 (-2.5, -0.8)     | -142.4 (-170.4, -114.4)                                | -142.8 (-170.8, -114.9) |
| Private insurance (ref: Medicaid/self-pay/other)                           | -0.2 (-0.7, 0.2)            | -0.2 (-0.6, 0.3)      | 46.8 (32.0, 61.5)                                      | 47.1 (32.4, 61.8)       |

|                                   |                   |                   |                      |                      |
|-----------------------------------|-------------------|-------------------|----------------------|----------------------|
| Parity (ref: multiparous)         | 1.7 (1.3, 2.1)    | 1.7 (1.2, 2.1)    | -62.8 (-76.7, -48.8) | -63.0 (-77.0, -49.1) |
| High-risk pregnancy (ref: no)     | -4.9 (-5.5, -4.3) | -4.8 (-5.5, -4.2) | -12.2 (-33.4, 8.9)   | -12.0 (-33.1, 9.2)   |
| Infant sex (ref: female)          | -1.0 (-1.4, -0.7) | -1.0 (-1.4, -0.7) | 133.8 (122.1, 145.4) | 133.9 (122.2, 145.5) |
| Prenatal care (ref: adequate)     |                   |                   |                      |                      |
| no care                           | -7.0 (-7.7, -6.3) | -6.9 (-7.7, -6.2) | -45.6 (-69.6, -21.6) | -44.8 (-68.8, -20.8) |
| inadequate                        | -1.7 (-2.3, -1.2) | -1.7 (-2.2, -1.1) | -44.1 (-61.4, -26.8) | -43.6 (-60.9, -26.3) |
| intermediate                      | 2.3 (1.6, 3.0)    | 2.4 (1.7, 3.1)    | -18.4 (-40.1, 3.4)   | -16.9 (-38.7, 4.9)   |
| adequate+                         | -8.5 (-9.0, -8.1) | -8.6 (-9.1, -8.2) | 5.9 (-9.0, 20.9)     | 4.1 (-10.9, 19.1)    |
| Year (ref: 2015)                  |                   |                   |                      |                      |
| 2012                              | -7.4 (-8.6, -6.3) | -7.4 (-8.5, -6.3) | 9.3 (-29.1, 47.8)    | 8.7 (-29.7, 47.2)    |
| 2013                              | -0.9 (-1.4, -0.4) | -0.9 (-1.3, -0.4) | 6.2 (-8.6, 21.0)     | 6.0 (-8.8, 20.8)     |
| 2014                              | -0.5 (-1.0, -0.1) | -0.5 (-0.9, 0.0)  | 3.2 (-11.3, 17.7)    | 3.4 (-11.0, 17.9)    |
| Season (ref: summer [JJA])        |                   |                   |                      |                      |
| spring (MAM)                      | 0.2 (-0.3, 0.7)   | 0.2 (-0.3, 0.7)   | 2.9 (-13.7, 19.5)    | 3.0 (-13.6, 19.6)    |
| fall (SON)                        | 0.5 (0.0, 1.0)    | 0.5 (0.0, 1.0)    | -6.7 (-22.9, 9.5)    | -6.7 (-22.8, 9.5)    |
| winter (DJF)                      | 1.3 (0.8, 1.8)    | 1.3 (0.8, 1.8)    | -2.6 (-19.3, 14.1)   | -2.8 (-19.5, 13.9)   |
| Gestational age (completed weeks) | --                | --                | 67.5 (62.8, 72.8)    | 67.2 (62.5, 72.0)    |

Note: See main text for the definition of variables. BMI = body mass index. CI = Confidence Interval. DJF = December, January, February. GED = general education development. JJA = June, July August. MAM = March, April, May. SON = September, October, November.



**Table S8.** Stratified logistic regression model results estimating the association between the number of flares within 5km during pregnancy, preterm birth, and small-for-gestational age birth among Hispanic and non-Hispanic White women

|                                                  | Preterm birth                              |                                                     | Small-for-gestational age                  |                                                     |
|--------------------------------------------------|--------------------------------------------|-----------------------------------------------------|--------------------------------------------|-----------------------------------------------------|
|                                                  | Hispanic<br>(N=12,781)<br>$\beta$ (95% CI) | Non-Hispanic White<br>(N=8,566)<br>$\beta$ (95% CI) | Hispanic<br>(N=12,780)<br>$\beta$ (95% CI) | Non-Hispanic White<br>(N=8,565)<br>$\beta$ (95% CI) |
| Flares within 5km (ref: 0)                       |                                            |                                                     |                                            |                                                     |
| low (1 -9)                                       | 0.72 [0.52, 0.99]                          | 0.75 [0.50, 1.12]                                   | 0.99 [0.73, 1.34]                          | 0.92 [0.62, 1.37]                                   |
| high ( $\geq 10$ )                               | 1.61 [1.25, 2.08]                          | 0.78 [0.50, 1.20]                                   | 1.09 [0.81, 1.45]                          | 1.04 [0.69, 1.57]                                   |
| Wells within 5km (ref: 0)                        |                                            |                                                     |                                            |                                                     |
| low                                              | 1.14 [0.97, 1.34]                          | 1.27 [1.02, 1.58]                                   | 0.94 [0.81, 1.10]                          | 1.03 [0.82, 1.29]                                   |
| medium                                           | 1.47 [1.24, 1.73]                          | 1.17 [0.93, 1.46]                                   | 1.01 [0.86, 1.19]                          | 0.92 [0.73, 1.17]                                   |
| high                                             | 1.40 [1.17, 1.66]                          | 1.24 [0.99, 1.55]                                   | 0.83 [0.69, 0.98]                          | 1.06 [0.84, 1.34]                                   |
| Age (ref: 20-24)                                 |                                            |                                                     |                                            |                                                     |
| < 20                                             | 0.96 [0.79, 1.17]                          | 0.95 [0.68, 1.32]                                   | 0.9 [0.76, 1.09]                           | 0.95 [0.69, 1.30]                                   |
| 25-29                                            | 0.90 [0.76, 1.05]                          | 0.96 [0.77, 1.18]                                   | 0.87 [0.74, 1.01]                          | 1.19 [0.96, 1.47]                                   |
| 30-34                                            | 1.09 [0.91, 1.30]                          | 1.18 [0.93, 1.50]                                   | 0.88 [0.73, 1.06]                          | 1.04 [0.80, 1.34]                                   |
| 35+                                              | 1.11 [0.90, 1.39]                          | 1.54 [1.16, 2.04]                                   | 0.89 [0.70, 1.13]                          | 1.03 [0.74, 1.43]                                   |
| Foreign-born (ref: no)                           | 0.80 [0.69, 0.93]                          | 1.11 [0.61, 2.03]                                   | 0.9 [0.8, 1.0]                             | 1.39 [0.77, 2.51]                                   |
| Education (ref: $\geq$ some college)             |                                            |                                                     |                                            |                                                     |
| < high school or GED                             | 1.28 [1.09, 1.51]                          | 1.56 [1.17, 2.08]                                   | 1.09 [0.92, 1.28]                          | 1.59 [1.20, 2.11]                                   |
| high school or GED                               | 1.16 [1.00, 1.35]                          | 1.24 [1.03, 1.50]                                   | 1.09 [0.94, 1.26]                          | 1.44 [1.18, 1.74]                                   |
| BMI (ref: underweight or normal)                 |                                            |                                                     |                                            |                                                     |
| overweight                                       | 0.82 [0.71, 0.95]                          | 1.02 [0.85, 1.23]                                   | 0.83 [0.72, 0.95]                          | 0.67 [0.55, 0.82]                                   |
| obese                                            | 0.80 [0.70, 0.91]                          | 0.92 [0.76, 1.11]                                   | 0.67 [0.58, 0.78]                          | 0.61 [0.50, 0.75]                                   |
| Smoking (ref: no)                                | 1.36 [0.92, 2.00]                          | 1.35 [1.07, 1.71]                                   | 1.50 [1.04, 2.18]                          | 2.03 [1.63, 2.53]                                   |
| Private insurance (ref: Medicaid/self-pay/other) | 0.96 [0.82, 1.13]                          | 0.90 [0.75, 1.08]                                   | 0.84 [0.71, 0.98]                          | 0.71 [0.59, 0.86]                                   |
| Parity (ref: multiparous)                        | 0.90 [0.78, 1.04]                          | 1.16 [0.97, 1.37]                                   | 1.53 [1.34, 1.76]                          | 1.29 [1.08, 1.54]                                   |
| High-risk pregnancy (ref: no)                    | 1.89 [1.60, 2.24]                          | 1.56 [1.25, 1.94]                                   | 1.30 [1.08, 1.58]                          | 1.46 [1.14, 1.88]                                   |
| Infant sex (ref: female)                         | 1.19 [1.06, 1.33]                          | 1.22 [1.06, 1.43]                                   | 1.10 [0.98, 1.23]                          | 0.83 [0.71, 0.97]                                   |
| Prenatal care (ref: adequate)                    |                                            |                                                     |                                            |                                                     |

|                            |                   |                   |                   |                   |
|----------------------------|-------------------|-------------------|-------------------|-------------------|
| no care                    | 6.16 [4.82, 7.88] | 5.05 [3.74, 6.81] | 1.08 [0.87, 1.34] | 1.33 [1.00, 1.79] |
| inadequate                 | 3.25 [2.60, 4.08] | 2.53 [1.90, 3.38] | 1.24 [1.06, 1.45] | 1.21 [0.96, 1.53] |
| intermediate               | 1.24 [0.85, 1.80] | 1.11 [0.73, 1.68] | 1.04 [0.83, 1.31] | 0.99 [0.74, 1.32] |
| adequate+                  | 6.79 [5.54, 8.31] | 6.23 [4.99, 7.78] | 0.75 [0.64, 0.87] | 0.84 [0.69, 1.03] |
| Year (ref: 2015)           |                   |                   |                   |                   |
| 2012                       | 2.76 [2.07, 3.69] | 1.97 [1.32, 2.95] | 0.76 [0.51, 1.14] | 1.18 [0.75, 1.86] |
| 2013                       | 1.22 [1.06, 1.42] | 1.20 [0.99, 1.46] | 1.01 [0.87, 1.17] | 0.88 [0.72, 1.08] |
| 2014                       | 1.08 [0.94, 1.26] | 1.11 [0.92, 1.35] | 1.06 [0.92, 1.22] | 1.00 [0.82, 1.21] |
| Season (ref: summer [JJA]) |                   |                   |                   |                   |
| spring (MAM)               | 1.06 [0.91, 1.25] | 1.00 [0.81, 1.24] | 1.15 [0.98, 1.35] | 1.01 [0.81, 1.27] |
| fall (SON)                 | 0.90 [0.76, 1.05] | 0.96 [0.78, 1.19] | 1.13 [0.96, 1.32] | 1.13 [0.91, 1.41] |
| winter (DJF)               | 0.98 [0.83, 1.15] | 0.95 [0.76, 1.18] | 1.01 [0.86, 1.19] | 1.08 [0.86, 1.36] |

Note: See main text for the definition of variables. BMI = body mass index. CI = Confidence Interval. DJF = December, January, February. GED = general education development. JJA = June, July August. MAM = March, April, May. SON = September, October, November.

**Table S9.** Stratified linear regression model results estimating the association between the number of flares within 5km during pregnancy and gestational age (in days) and term birth weight (in grams) among Hispanic and non-Hispanic White women

|                                                  | Gestational age                      |                                                  | Term birthweight<br>(≥ 37 completed weeks) |                                               |
|--------------------------------------------------|--------------------------------------|--------------------------------------------------|--------------------------------------------|-----------------------------------------------|
|                                                  | Hispanic<br>(N=12,781)<br>β (95% CI) | Non-Hispanic<br>White<br>(N=8,566)<br>β (95% CI) | Hispanic<br>(N=11,369)<br>β (95% CI)       | Non-Hispanic White<br>(N=7,770)<br>β (95% CI) |
| Flares within 5km (ref: 0)                       |                                      |                                                  |                                            |                                               |
| low (1 -9)                                       | 0.6 [-0.7, 12.0]                     | 0.4 [-1.0, 1.7]                                  | -25.6 [-67.0, 15.8]                        | 6.6 [-39.8, 53.1]                             |
| high (≥10)                                       | -2.2 [-3.4, -0.9]                    | -0.0 [-1.5, 1.5]                                 | -24.8 [-66.6, 16.9]                        | 4.0 [-47.5, 55.5]                             |
| Wells within 5km (ref: 0)                        |                                      |                                                  |                                            |                                               |
| low                                              | -0.8 [-1.4, -0.1]                    | -1.4 [-2.2, 0.5]                                 | -0.5 [-21.8, 20.7]                         | -1.3 [-29.0, 26.5]                            |
| medium                                           | -1.8 [-2.5, -1.1]                    | -1.6 [-2.4, -0.8]                                | -23.5 [-46.4, -0.65]                       | -10.6 [-38.4, 17.1]                           |
| high                                             | -1.4 [-2.2, -0.7]                    | -1.3 [-2.1, -0.5]                                | 5.1 [-18.2, 28.5]                          | -43.4 [-71.6, -15.2]                          |
| Age (ref: 20-24)                                 |                                      |                                                  |                                            |                                               |
| < 20                                             | -0.7 [-1.6, 0.1]                     | 0.1 [-1.1, 1.4]                                  | -13.8 [-40.9, 13.3]                        | 32.6 [-11.2, 76.4]                            |
| 25-29                                            | -2.0 [-2.7, -1.3]                    | 0.2 [-0.5, 1.0]                                  | 44.4 [23.3, 65.6]                          | -1.9 [-28.4, 24.6]                            |
| 30-34                                            | 2.4 [1.4, 3.4]                       | -0.6 [-1.4, 0.3]                                 | 58.2 [33.0, 83.4]                          | 31.5 [1.0, 62.0]                              |
| 35+                                              | -8.7 [-9.3, -8.0]                    | -1.9 [-3.0, -0.8]                                | 56.4 [25.2, 87.7]                          | 29.8 [-8.4, 68.1]                             |
| Foreign-born (ref: no)                           | 1.3 [0.7, 1.9]                       | -0.5 [-2.8, 1.9]                                 | 44.9 [25.5, 64.2]                          | 55.6 [-24.3, 135.5]                           |
| Education (ref: ≥ some college)                  |                                      |                                                  |                                            |                                               |
| < high school or GED                             | -0.8 [-1.4, -0.1]                    | -2.0 [-3.2, -0.8]                                | -21.7 [-43.8, 0.4]                         | -102.8 [-143.6, -62.0]                        |
| high school or GED                               | -0.2 [-0.9, 0.4]                     | -0.6 [-1.3, 0.1]                                 | -17.2 [-37.4, 2.9]                         | -59.4 [-83.7, -35.2]                          |
| BMI (ref: underweight or normal)                 |                                      |                                                  |                                            |                                               |
| overweight                                       | 0.9 [0.3, 1.5]                       | -0.1 [-0.8, 0.6]                                 | 61.9 [42.3, 81.5]                          | 93.0 [69.3, 116.6]                            |
| obese                                            | 0.9 [0.3, 1.5]                       | 0.5 [-0.2, 1.2]                                  | 135.8 [116.5, 155.1]                       | 134.3 [110.5, 158.0]                          |
| Smoking (ref: no)                                | -1.7 [-3.6, 0.2]                     | -1.2 [-2.2, -0.2]                                | -126.5 [-188.1, -64.9]                     | -151.7 [-186.2, -117.3]                       |
| Private insurance (ref: Medicaid/self-pay/other) | 0.2 [-0.5, 0.9]                      | -0.3 [-1.0, 0.4]                                 | 49.7 [28.6, 70.8]                          | 30.0 [7.3, 52.7]                              |
| Parity (ref: multiparous)                        | 1.8 [1.2, 2.4]                       | 1.4 [0.7, 2.0]                                   | -56.4 [-76.0, -36.9]                       | -72.1 [-93.9, -50.3]                          |
| High-risk pregnancy (ref: no)                    | -4.9 [-5.7, -4.0]                    | -4.2 [-5.1, -3.2]                                | 8.0 [-20.8, 36.9]                          | -29.6 [-63.4, 4.1]                            |
| Infant sex (ref: female)                         | -0.8 [-1.3, -0.3]                    | -1.3 [-1.8, -0.7]                                | 118.7 [103.0, 134.3]                       | 154.6 [135.5, 173.7]                          |

|                                   |                   |                   |                      |                       |
|-----------------------------------|-------------------|-------------------|----------------------|-----------------------|
| Prenatal care (ref: adequate)     |                   |                   |                      |                       |
| no care                           | -7.7 [-8.7, -6.8] | -6.0 [-7.2, -4.9] | -25.6 [-57.6, 6.3]   | -81.1 [-121.5, -40.8] |
| inadequate                        | -2.0 [-2.7, -1.3] | -1.4 [-2.3, -0.5] | -34.1 [-57.0, -11.3] | -59.8 [-90.2, -29.3]  |
| intermediate                      | 2.4 [1.4, 3.7]    | 2.7 [1.7, 3.7]    | -18.0 [-48.9, 13.0]  | -17.7 [-51.1, 15.8]   |
| adequate+                         | -8.7 [-9.3, -8.0] | -8.6 [-9.3, -7.9] | 16.6 [-3.7, 36.9]    | -9.2 [-33.4, 15.1]    |
| Year (ref: 2015)                  |                   |                   |                      |                       |
| 2012                              | -7.1 [-8.7, -5.6] | -1.3 [-8.6, -5.1] | 10.2 [-42.4, 62.9]   | -6.0 [-67.8, 55.8]    |
| 2013                              | -1.0 [-1.6, -0.4] | -0.9 [-1.6, 0.1]  | 4.2 [-15.8, 24.2]    | -0.9 [-25.1, 23.3]    |
| 2014                              | -0.6 [-1.2, 0.0]  | -0.4 [-1.1, 0.3]  | -7.5 [-27.0, 12.0]   | 6.4 [-17.2, 29.9]     |
| Season (ref: summer [JJA])        |                   |                   |                      |                       |
| spring (MAM)                      | 0.4 [-0.3, 1.1]   | -0.4 [-1.2, 0.4]  | 14.0 [-8.5, 36.5]    | -18.0 [-44.8, 8.8]    |
| fall (SON)                        | -2.0 [-2.7, -1.3] | 0.5 [-0.2, 1.3]   | 3.7 [-18.0, 25.4]    | -19.5 [-46.0, 6.9]    |
| winter (DJF)                      | 1.1 [0.4, 1.8]    | 1.3 [0.5, 2.1]    | -0.5 [-22.9, 21.8]   | -11.9 [-39.6, 15.9]   |
| Gestational age (completed weeks) | --                | --                | 55.8 [49.4, 62.1]    | 80.9 [73.0, 88.7]     |

Note: See main text for the definition of variables. BMI = body mass index. CI = Confidence Interval. DJF = December, January, February. GED = general education development. JJA = June, July August. MAM = March, April, May. SON = September, October, November.

**Table S10.** Logistic regression model results estimating the association between the number of flares within 5km during pregnancy and preterm birth, controlling for rurality (residence in a census-designated place)

|                                                  |                   | <b>Preterm birth</b> |  |
|--------------------------------------------------|-------------------|----------------------|--|
|                                                  |                   | N=23,158             |  |
|                                                  | <b>Model 1</b>    | <b>Model 2</b>       |  |
|                                                  | $\beta$ (95% CI)  | $\beta$ (95% CI)     |  |
| Flares within 5km (ref: 0)                       |                   |                      |  |
| low (1 -9)                                       | 0.82 (0.64, 1.04) | 0.76 (0.60, 0.97)    |  |
| high ( $\geq 10$ )                               | 1.48 (1.21, 1.81) | 1.36 (1.11, 1.68)    |  |
| Wells within 5km (ref: 0)                        |                   |                      |  |
| low                                              | --                | 1.19 (1.05, 1.34)    |  |
| medium                                           | --                | 1.34 (1.18, 1.52)    |  |
| high                                             | --                | 1.30 (1.14, 1.48)    |  |
| Age (ref: 20-24)                                 |                   |                      |  |
| < 20                                             | 0.97 (0.83, 1.14) | 0.97 (0.83, 1.14)    |  |
| 25-29                                            | 0.91 (0.81, 1.03) | 0.91 (0.81, 1.03)    |  |
| 30-34                                            | 1.10 (0.96, 1.26) | 1.10 (0.96, 1.26)    |  |
| 35+                                              | 1.27 (1.07, 1.49) | 1.27 (1.08, 1.50)    |  |
| Race/ethnicity (ref: Hispanic)                   |                   |                      |  |
| non-Hispanic White                               | 0.93 (0.84, 1.04) | 0.92 (0.82, 1.02)    |  |
| all others                                       | 1.27 (1.08, 1.48) | 1.27 (1.09, 1.49)    |  |
| Foreign-born (ref: no)                           | 0.80 (0.70, 0.91) | 0.81 (0.71, 0.93)    |  |
| Education (ref: $\geq$ some college)             |                   |                      |  |
| < high school or GED                             | 1.36 (1.19, 1.55) | 1.35 (1.19, 1.54)    |  |
| high school or GED                               | 1.22 (1.09, 1.36) | 1.22 (1.09, 1.36)    |  |
| BMI (ref: underweight or normal)                 |                   |                      |  |
| overweight                                       | 0.91 (0.81, 1.01) | 0.91 (0.82, 1.01)    |  |
| obese                                            | 0.87 (0.78, 0.97) | 0.87 (0.78, 0.97)    |  |
| Smoking (ref: no)                                | 1.40 (1.17, 1.69) | 1.41 (1.17, 1.70)    |  |
| Private insurance (ref: Medicaid/self-pay/other) | 0.97 (0.87, 1.08) | 0.96 (0.86, 1.07)    |  |
| Parity (ref: multiparous)                        | 0.97 (0.87, 1.08) | 0.97 (0.88, 1.08)    |  |
| High-risk pregnancy (ref: no)                    | 1.81 (1.60, 2.05) | 1.79 (1.58, 2.03)    |  |
| Infant sex (ref: female)                         | 1.21 (1.11, 1.32) | 1.20 (1.10, 1.31)    |  |
| Prenatal care (ref: adequate)                    |                   |                      |  |
| no care                                          | 5.60 (4.68, 6.70) | 5.53 (4.62, 6.62)    |  |
| inadequate                                       | 2.98 (2.52, 3.52) | 2.95 (2.50, 3.49)    |  |
| intermediate                                     | 1.21 (0.93, 1.58) | 1.20 (0.92, 1.56)    |  |
| adequate+                                        | 6.27 (5.44, 7.23) | 6.40 (5.56, 7.38)    |  |
| Year (ref: 2015)                                 |                   |                      |  |
| 2012                                             | 2.42 (1.94, 3.03) | 2.41 (1.93, 3.02)    |  |
| 2013                                             | 1.19 (1.07, 1.33) | 1.19 (1.06, 1.33)    |  |
| 2014                                             | 1.07 (0.95, 1.19) | 1.06 (0.95, 1.18)    |  |
| Season (ref: summer [JJA])                       |                   |                      |  |

|                                                  |                   |                   |
|--------------------------------------------------|-------------------|-------------------|
| spring (MAM)                                     | 1.02 (0.91, 1.16) | 1.02 (0.90, 1.16) |
| fall (SON)                                       | 0.95 (0.84, 1.07) | 0.94 (0.84, 1.07) |
| winter (DJF)                                     | 0.95 (0.84, 1.07) | 0.95 (0.84, 1.08) |
| Residence in a Census-designated place (Ref: No) | 1.07 (0.98, 1.17) | 1.03 (0.94, 1.13) |

Note: See main text for the definition of variables. BMI = body mass index. CI = Confidence Interval. DJF = December, January, February. GED = general education development. JJA = June, July August. MAM = March, April, May. SON = September, October, November.

**Figure S1.** Construction of the dataset

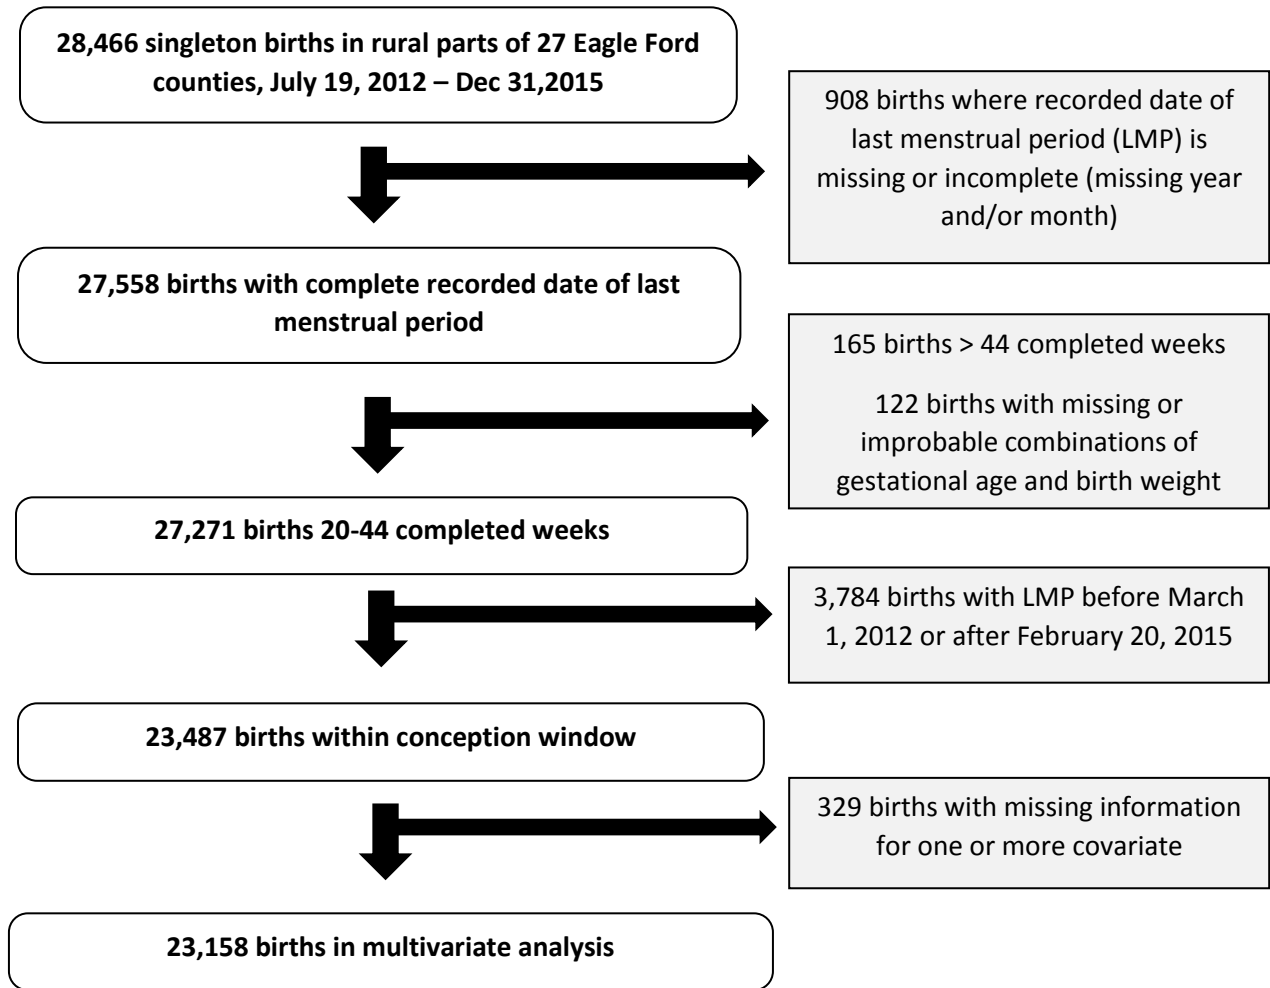

Note: Numbers may not sum because criteria were not mutually exclusive.

**Figure S2.** Spearman's correlation coefficients between the total number of flares within 5km during pregnancy, and the number of flares by trimester.

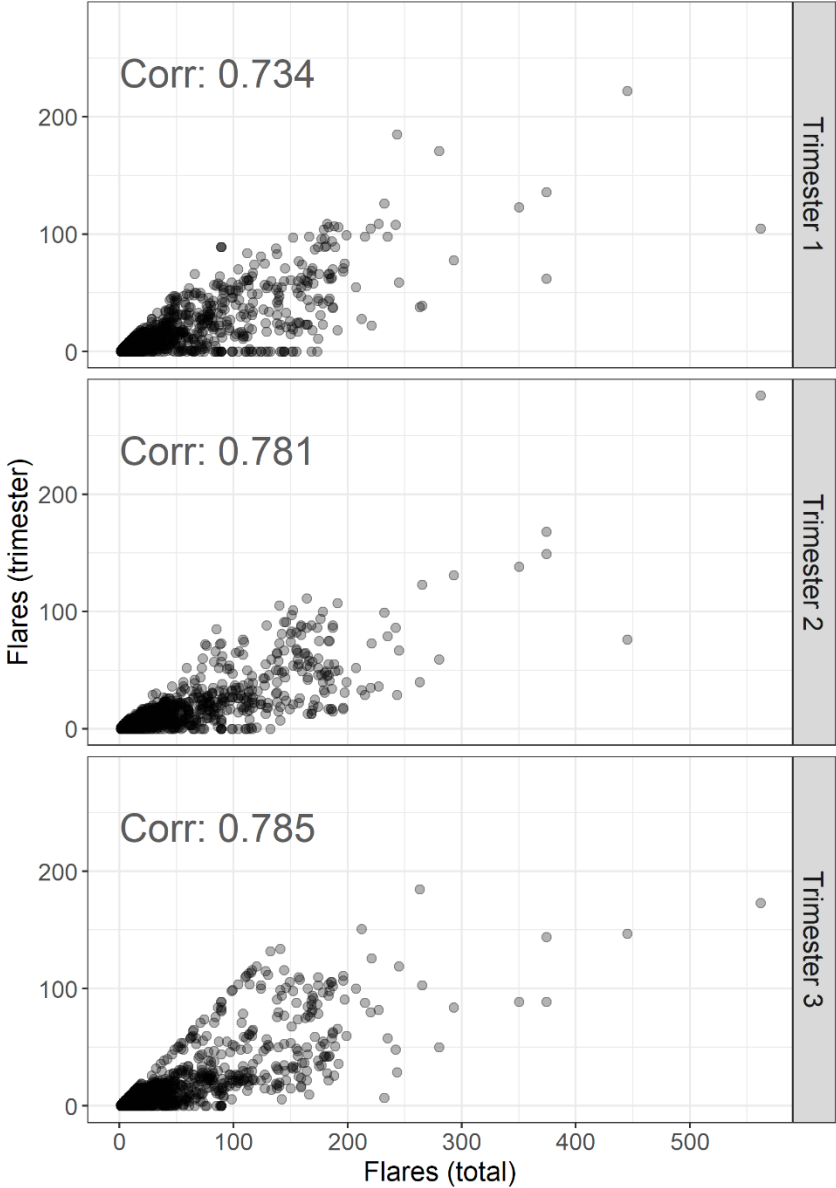

Supplement: ehp6394.s001.acco.pdf [file ehp6394.s001.acco.pdf]
