# Supplementary material
Source: PubMed Central journal article supplement (PMC7362742)
Supplement: ehp6394.smcontents.508.pdf [file ehp6394.smcontents.508.pdf]

**Note to readers with disabilities:** *EHP* strives to ensure that all journal content is accessible to all readers. However, some figures and Supplemental Material published in *EHP* articles may not conform to [508 standards](#) due to the complexity of the information being presented. If you need assistance accessing journal content, please contact [ehp508@niehs.nih.gov](mailto:ehp508@niehs.nih.gov). Our staff will work with you to assess and meet your accessibility needs within 3 working days.

### **Supplemental Material**

#### **Flaring from Unconventional Oil and Gas Development and Birth Outcomes in the Eagle Ford Shale in South Texas**

Lara J. Cushing, Kate Vavra-Musser, Khang Chau, Meredith Franklin, and Jill E. Johnston

#### **Table of Contents**

**Table S1.** Adverse birth outcomes by mother's characteristics, study sample population from Texas Eagle Ford Shale region, 2012-2015 (N=23,487).

**Table S2.** Logistic regression model results estimating the association between the number of flares within 5km during pregnancy, preterm birth, and small-for-gestational age birth.

**Table S3.** Linear regression model results estimating the association between the number of flares within 5km during pregnancy and gestational age (in days) and term birth weight (in grams).

**Table S4.** Logistic regression model results estimating the association between flared area within 5km during pregnancy, preterm birth, and small-for-gestational age birth.

**Table S5.** Linear regression model results estimating the association between flared area within 5km during pregnancy and gestational age (in days) and term birth weight (in grams).

**Table S6.** Logistic regression model results estimating the association between the inverse squared distance-weighted number of flares within 5km during pregnancy, preterm birth, and small-for-gestational age birth.

**Table S7.** Linear regression model results estimating the association between the inverse squared distance weighted number of flares within 5km during pregnancy and gestational age (in days) and term birth weight (in grams).

**Table S8.** Stratified logistic regression model results estimating the association between the number of flares within 5km during pregnancy, preterm birth, and small-for-gestational age birth among Hispanic and non-Hispanic White women.

**Table S9.** Stratified linear regression model results estimating the association between the number of flares within 5km during pregnancy and gestational age (in days) and term birth weight (in grams) among Hispanic and non-Hispanic White women.

**Table S10.** Logistic regression model results estimating the association between the number of flares within 5km during pregnancy and preterm birth, controlling for rurality (residence in a census-designated place).

**Figure S1.** Construction of the dataset.

**Figure S2.** Spearman's correlation coefficients between the total number of flares within 5km during pregnancy, and the number of flares by trimester.
